# Supplementary material for: Antibody-mediated allograft rejection is associated with an increase in peripheral differentiated CD28-CD8+ T cells – Analyses of a cohort of 1032 kidney transplant recipients
Source: PubMed Central journal article supplement — eBioMedicine. 2022 Aug 18;83:104226. doi: 10.1016/j.ebiom.2022.104226 (PMC9420477; doi:10.1016/j.ebiom.2022.104226), 2022-08-18

## SUPPLEMENTARY MATERIALS

### Table of contents

|                        |    |
|------------------------|----|
| Supplementary Table 1  | p2 |
| Supplementary Table 2  | p3 |
| Supplementary Table 3  | p4 |
| Supplementary Table 4  | p5 |
| Supplementary Figure 1 | p6 |
| Supplementary Figure 2 | p6 |
| Supplementary Figure 3 | p7 |
| Supplementary Figure 4 | p8 |
| Supplementary Figure 5 | p8 |

**Supplementary Table 1:** Unadjusted effects of baseline covariates on log percentage of CD28-CD8+ T cells estimated from linear mixed models.

|                                                        | NA | Mean difference | 95% CI          | p-value |
|--------------------------------------------------------|----|-----------------|-----------------|---------|
| <b>Biopsy group</b>                                    | 0  |                 |                 | <0.0001 |
| 2 (vs. 1)                                              |    | 0.37            | [0.18 ; 0.56]   |         |
| 3 (vs. 1)                                              |    | 0.43            | [0.29 ; 0.57]   |         |
| 4 (vs. 1)                                              |    | 0.22            | [-0.01 ; 0.46]  |         |
| 5 (vs. 1)                                              |    | 0.17            | [-0.01 ; 0.36]  |         |
| <b>Transplantation after 2008</b>                      | 0  | -0.22           | [-0.37 ; -0.07] | 0.0032  |
| <b>Recipient age (years)</b>                           | 0  | 0.01            | [0.01 ; 0.01]   | <0.0001 |
| <b>Male recipient</b>                                  | 0  | -0.11           | [-0.24 ; 0.02]  | 0.0920  |
| <b>Retransplantation</b>                               | 0  | 0.38            | [0.21 ; 0.56]   | <0.0001 |
| <b>Renal transplantation</b>                           | 0  | 0.13            | [-0.07 ; 0.33]  | 0.2085  |
| <b>Recurrent initial disease</b>                       | 0  | 0.10            | [-0.05 ; 0.25]  | 0.2062  |
| <b>DGF</b>                                             | 29 | 0.16            | [0.03 ; 0.30]   | 0.0192  |
| <b>Cold ischemia time (hours)</b>                      | 0  | 0.02            | [0.01 ; 0.02]   | <0.0001 |
| <b>History of diabetes</b>                             | 0  | 0.05            | [-0.10 ; 0.19]  | 0.5476  |
| <b>History of hypertension</b>                         | 0  | 0.06            | [-0.15 ; 0.27]  | 0.5669  |
| <b>History of cardiovascular disease</b>               | 0  | 0.14            | [0.01 ; 0.27]   | 0.0349  |
| <b>Recipient/Donor CMV serology</b>                    | 0  |                 |                 | <0.0001 |
| 1 (vs. 0)                                              |    | 1.18            | [1.04 ; 1.33]   |         |
| 2 (vs. 0)                                              |    | 0.69            | [0.54 ; 0.83]   |         |
| 3 (vs. 0)                                              |    | 1.25            | [1.10 ; 1.40]   |         |
| <b>Donor age (years)</b>                               | 0  | 0.01            | [0.00 ; 0.01]   | <0.0001 |
| <b>Male donor</b>                                      | 1  | -0.02           | [-0.15 ; 0.11]  | 0.7707  |
| <b>Deceased donor</b>                                  | 0  | 0.35            | [0.14 ; 0.56]   | 0.0009  |
| <b>HLA-A-B-DR mismatches &gt; 4</b>                    | 0  | -0.09           | [-0.24 ; 0.07]  | 0.2566  |
| <b>ABO mismatch</b>                                    | 10 | -0.43           | [-0.90 ; 0.05]  | 0.0781  |
| <b>Depleting induction</b>                             | 0  | 0.12            | [-0.01 ; 0.25]  | 0.0644  |
| <b>CSA</b>                                             | 0  | 0.24            | [0.03 ; 0.45]   | 0.0252  |
| <b>Tacrolimus</b>                                      | 0  | -0.18           | [-0.39 ; 0.02]  | 0.0815  |
| <b>Steroid</b>                                         | 0  | 0.11            | [-0.06 ; 0.29]  | 0.2039  |
| <b>Positive anti-class I immunization</b>              | 1  | 0.16            | [0.02 ; 0.30]   | 0.0276  |
| <b>Positive anti-class II immunization</b>             | 1  | 0.18            | [0.03 ; 0.32]   | 0.0156  |
| <b>Positive DSA</b>                                    | 1  | -0.02           | [-0.28 ; 0.25]  | 0.8921  |
| <b>Biopsy rank</b>                                     | 0  |                 |                 | <0.0001 |
| 2 (vs. 1)                                              |    | 0.32            | [0.25 ; 0.40]   |         |
| 3 (vs. 1)                                              |    | 0.47            | [0.32 ; 0.62]   |         |
| 4 (vs. 1)                                              |    | 0.94            | [0.50 ; 1.37]   |         |
| 5 (vs. 1)                                              |    | 0.61            | [-0.56 ; 1.79]  |         |
| <b>For cause biopsy</b>                                | 0  | 0.07            | [-0.02 ; 0.17]  | 0.1399  |
| <b>Creatininemia at biopsy (μmol/l)</b>                | 22 | -0.00           | [-0.00 ; 0.00]  | 0.9239  |
| <b>Post-transplantation time of the biopsy (years)</b> | 0  | 0.03            | [0.02 ; 0.05]   | <0.0001 |

CI, confidence interval; CMV, cytomegalovirus; CSA, cyclosporin A; DGF, delayed graft function; DSA, donor specific antibodies; HLA, human leucocyte antigens; NA: not available (missing). Recipient/Donor CMV serology definition, 0: negative donor and recipient; 1: negative donor and positive recipient; 2: positive donor and negative recipient; 3: positive donor and recipient.

**Supplementary Table 2:** Unadjusted effects of baseline covariates on log absolute number of CD28-CD8+ T cells estimated from linear mixed models.

|                                                        | NA | Mean difference | 95% CI          | p-value |
|--------------------------------------------------------|----|-----------------|-----------------|---------|
| <b>Biopsy group</b>                                    | 0  |                 |                 | <0.0001 |
| <b>2 (vs. 1)</b>                                       |    | 0.56            | [0.31 ; 0.82]   |         |
| <b>3 (vs. 1)</b>                                       |    | 0.60            | [0.42 ; 0.79]   |         |
| <b>4 (vs. 1)</b>                                       |    | 0.16            | [-0.16 ; 0.48]  |         |
| <b>5 (vs. 1)</b>                                       |    | 0.33            | [0.07 ; 0.59]   |         |
| <b>Transplantation after 2008</b>                      | 0  | -0.51           | [-0.69 ; -0.33] | <0.0001 |
| <b>Recipient age (years)</b>                           | 0  | 0.00            | [-0.00 ; 0.01]  | 0.1326  |
| <b>Male recipient</b>                                  | 0  | -0.00           | [-0.17 ; 0.16]  | 0.9553  |
| <b>Retransplantation</b>                               | 0  | 0.00            | [-0.21 ; 0.22]  | 0.9733  |
| <b>Renal transplantation</b>                           | 0  | 0.42            | [0.17 ; 0.67]   | 0.0010  |
| <b>Recurrent initial disease</b>                       | 0  | 0.18            | [-0.01 ; 0.37]  | 0.0576  |
| <b>DGF</b>                                             | 29 | 0.13            | [-0.04 ; 0.30]  | 0.1284  |
| <b>Cold ischemia time (hours)</b>                      | 0  | 0.02            | [0.01 ; 0.03]   | <0.0001 |
| <b>History of diabetes</b>                             | 0  | -0.08           | [-0.26 ; 0.10]  | 0.3898  |
| <b>History of hypertension</b>                         | 0  | 0.06            | [-0.20 ; 0.31]  | 0.6582  |
| <b>History of cardiovascular disease</b>               | 0  | 0.01            | [-0.15 ; 0.18]  | 0.8791  |
| <b>Recipient/Donor CMV serology</b>                    | 0  |                 |                 | <0.0001 |
| <b>1 (vs. 0)</b>                                       |    | 1.18            | [0.99 ; 1.37]   |         |
| <b>2 (vs. 0)</b>                                       |    | 0.69            | [0.49 ; 0.88]   |         |
| <b>3 (vs. 0)</b>                                       |    | 1.28            | [1.08 ; 1.47]   |         |
| <b>Donor age (years)</b>                               | 0  | 0.00            | [0.00 ; 0.01]   | 0.0468  |
| <b>Male donor</b>                                      | 1  | -0.03           | [-0.18 ; 0.13]  | 0.7550  |
| <b>Deceased donor</b>                                  | 0  | 0.25            | [-0.00 ; 0.51]  | 0.0529  |
| <b>HLA-A-B-DR mismatches &gt; 4</b>                    | 0  | -0.12           | [-0.31 ; 0.07]  | 0.2069  |
| <b>ABO mismatch</b>                                    | 10 | -0.72           | [-1.30 ; -0.15] | 0.0141  |
| <b>Depleting induction</b>                             | 0  | -0.43           | [-0.59 ; -0.28] | <0.0001 |
| <b>CSA</b>                                             | 0  | 0.50            | [0.24 ; 0.76]   | 0.0001  |
| <b>Tacrolimus</b>                                      | 0  | -0.45           | [-0.70 ; -0.19] | 0.0006  |
| <b>Steroid</b>                                         | 0  | -0.19           | [-0.40 ; 0.02]  | 0.0789  |
| <b>Positive anti-class I immunization</b>              | 1  | -0.10           | [-0.27 ; 0.08]  | 0.2739  |
| <b>Positive anti-class II immunization</b>             | 1  | -0.09           | [-0.27 ; 0.09]  | 0.3128  |
| <b>Positive DSA</b>                                    | 1  | -0.35           | [-0.67 ; -0.03] | 0.0339  |
| <b>Biopsy rank</b>                                     | 0  |                 |                 | <0.0001 |
| <b>2 (vs. 1)</b>                                       |    | 0.53            | [0.43 ; 0.63]   |         |
| <b>3 (vs. 1)</b>                                       |    | 0.83            | [0.63 ; 1.04]   |         |
| <b>4 (vs. 1)</b>                                       |    | 1.21            | [0.60 ; 1.81]   |         |
| <b>5 (vs. 1)</b>                                       |    | 1.22            | [-0.42 ; 2.86]  |         |
| <b>For cause biopsy</b>                                | 0  | 0.16            | [0.04 ; 0.30]   | 0.0123  |
| <b>Creatininemia at biopsy (µmol/l)</b>                | 22 | -0.00           | [-0.00 ; 0.00]  | 0.2316  |
| <b>Post-transplantation time of the biopsy (years)</b> | 0  | 0.07            | [0.05 ; 0.09]   | <0.0001 |

CI, confidence interval; CMV, cytomegalovirus; CSA, cyclosporin A; DGF, delayed graft function; DSA, donor specific antibodies; HLA, human leucocyte antigens; NA, not available (missing). Recipient/Donor CMV serology definition, 0: negative donor and recipient; 1: negative donor and positive recipient; 2: positive donor and negative recipient; 3: positive donor and recipient.

**Supplementary Table 3:** Characteristics of 510 patients included in the graft survival study (patients who underwent 1-year protocol biopsy with a lymphocyte phenotyping at the same time).

|                                                               | NA        | n        | %         |
|---------------------------------------------------------------|-----------|----------|-----------|
| <b>Transplantation after 2008</b>                             | 0         | 421      | 82.5      |
| <b>Recipient older than 55 years</b>                          | 0         | 194      | 38.0      |
| <b>Male recipient</b>                                         | 0         | 327      | 64.1      |
| <b>Retransplantation</b>                                      | 0         | 65       | 12.7      |
| <b>Renal transplantation</b>                                  | 0         | 448      | 87.8      |
| <b>Recurrent initial disease</b>                              | 0         | 112      | 22.0      |
| <b>DGF</b>                                                    | 4         | 153      | 30.2      |
| <b>Cold ischemia time (hours)</b>                             | 0         |          |           |
| Less than 12 hours                                            |           | 114      | 22.4      |
| Between 12 and 24 hours                                       |           | 340      | 66.7      |
| 24 hours and more                                             |           | 56       | 11.0      |
| <b>History of diabetes</b>                                    | 0         | 139      | 27.3      |
| <b>History of hypertension</b>                                | 0         | 455      | 89.2      |
| <b>History of cardiovascular disease</b>                      | 0         | 177      | 34.7      |
| <b>Recipient/Donor CMV serology</b>                           | 0         |          |           |
| 0                                                             |           | 180      | 35.3      |
| 1                                                             |           | 111      | 21.8      |
| 2                                                             |           | 113      | 22.2      |
| 3                                                             |           | 106      | 20.8      |
| <b>Donor older than 55 years</b>                              | 0         | 211      | 41.4      |
| <b>Male donor</b>                                             | 0         | 296      | 58.0      |
| <b>Deceased donor</b>                                         | 0         | 461      | 90.4      |
| <b>HLA-A-B-DR mismatches &gt; 4</b>                           | 0         | 111      | 21.8      |
| <b>ABO mismatch</b>                                           | 2         | 11       | 2.2       |
| <b>Depleting induction</b>                                    | 0         | 191      | 37.5      |
| <b>CSA</b>                                                    | 0         | 20       | 3.9       |
| <b>Tacrolimus</b>                                             | 0         | 490      | 96.1      |
| <b>Steroid</b>                                                | 0         | 424      | 83.1      |
| <b>Positive anti-class I immunization</b>                     | 0         | 149      | 29.2      |
| <b>Positive anti-class II immunization</b>                    | 0         | 124      | 24.3      |
| <b>Positive DSA</b>                                           | 0         | 26       | 5.1       |
|                                                               | <b>NA</b> | <b>m</b> | <b>SD</b> |
| <b>Log of CD28-CD8+ T cells (%)</b>                           | 1         | 2.1      | 1.1       |
| <b>Log of CD28-CD8+ T cells (absolute value)</b>              | 2         | -2.4     | 1.3       |
| <b>Creatininemia at biopsy (<math>\mu\text{mol/l}</math>)</b> | 11        | 136.3    | 49.0      |

CMV, cytomegalovirus; CSA, cyclosporin A; DGF, delayed graft function; DSA, donor specific antibodies; HLA, human leucocyte antigens; m, mean; NA, not available (missing); SD, standard deviation. Recipient/Donor CMV serology definition, 0: negative donor and recipient; 1: negative donor and positive recipient; 2: positive donor and negative recipient; 3: positive donor and recipient; Log: natural logarithm.

**Supplementary Table 4:** Unadjusted Cox models studying the associations between different variables and graft survival.

|                                           | NA | HR   | 95% CI         | p-value |
|-------------------------------------------|----|------|----------------|---------|
| Log of CD28-CD8+ T cells (%)              | 1  | 1.14 | [0.89 ; 1.45]  | 0.2969  |
| Log of CD28-CD8+ T cells (absolute value) | 2  | 1.10 | [0.89 ; 1.35]  | 0.3715  |
| Transplantation after 2008                | 0  | 0.81 | [0.46 ; 1.42]  | 0.4640  |
| Recipient older than 55 years             | 0  | 1.18 | [0.70 ; 1.97]  | 0.5341  |
| Male recipient                            | 0  | 1.49 | [0.85 ; 2.61]  | 0.1607  |
| Retransplantation                         | 0  | 1.63 | [0.80 ; 3.32]  | 0.1818  |
| Renal transplantation                     | 0  | 0.97 | [0.42 ; 2.26]  | 0.9452  |
| Recurrent initial disease                 | 0  | 0.80 | [0.41 ; 1.53]  | 0.4917  |
| DGF                                       | 4  | 1.70 | [1.02 ; 2.86]  | 0.0434  |
| Cold ischemia time (hours)                | 0  |      |                | 0.0816  |
| Between 12 and 24 (vs. Less than 12)      |    | 3.20 | [1.15 ; 8.89]  |         |
| 24 and more (vs. Less than 12)            |    | 3.16 | [0.97 ; 10.32] |         |
| History of diabetes                       | 0  | 1.35 | [0.77 ; 2.36]  | 0.3006  |
| History of HTA                            | 0  | 0.58 | [0.29 ; 1.19]  | 0.1375  |
| History of cardiovascular disease         | 0  | 1.11 | [0.65 ; 1.88]  | 0.7064  |
| Recipient/Donor CMV serology              | 0  |      |                | 0.9977  |
| 1 (vs. 0)                                 |    | 0.98 | [0.49 ; 1.96]  |         |
| 2 (vs. 0)                                 |    | 1.05 | [0.54 ; 2.07]  |         |
| 3 (vs. 0)                                 |    | 0.99 | [0.49 ; 1.97]  |         |
| Donor older than 55 years                 | 0  | 1.49 | [0.90 ; 2.47]  | 0.1186  |
| Male donor                                | 0  | 1.07 | [0.64 ; 1.77]  | 0.8051  |
| Deceased donor                            | 0  | 2.29 | [0.56 ; 9.40]  | 0.2506  |
| HLA-A-B-DR mismatches > 4                 | 0  | 1.60 | [0.91 ; 2.80]  | 0.1013  |
| ABO mismatch                              | 2  | 1.27 | [0.17 ; 9.23]  | 0.8141  |
| Depleting induction                       | 0  | 1.11 | [0.65 ; 1.90]  | 0.6894  |
| CSA                                       | 0  | 2.77 | [1.19 ; 6.43]  | 0.0179  |
| Tacrolimus                                | 0  | 0.63 | [0.23 ; 1.73]  | 0.3696  |
| Steroid                                   | 0  | 0.78 | [0.44 ; 1.38]  | 0.3905  |
| Positive anti-class I immunization        | 0  | 1.00 | [0.57 ; 1.76]  | 0.9929  |
| Positive anti-class II immunization       | 0  | 1.54 | [0.89 ; 2.67]  | 0.1268  |
| Positive DSA                              | 0  | 1.46 | [0.46 ; 4.69]  | 0.5222  |
| Creatininemia at biopsy (μmol/l)          | 11 | 1.02 | [1.01 ; 1.02]  | <0.0001 |

CI, confidence interval; CSA, cyclosporin A; CMV, cytomegalovirus; DGF, delayed graft function; DSA, donor specific antibodies; HLA, human leucocyte antigens; HR, hazard ratio; NA: not available (missing). Recipient/Donor CMV serology definition, 0: negative donor and recipient; 1: negative donor and positive recipient; 2: positive donor and negative recipient; 3: positive donor and recipient; Log: natural logarithm.

**Supplementary Figure 1:** Gating strategy to identify the CD8+ and CD8+ CD28- T cell subsets from whole blood using flow cytometry. Numbers indicate the percentage of the gated population. Lym: lymphocytes.

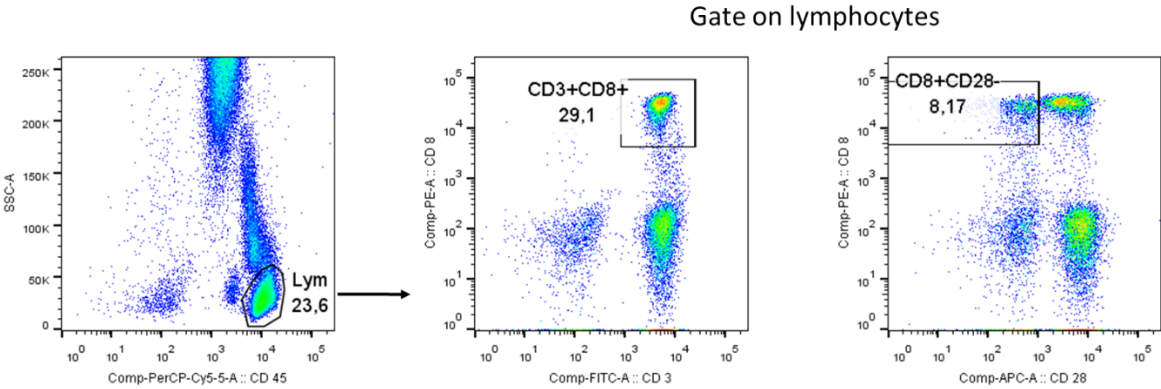

**Supplementary Figure 2:** Distribution of the natural logarithm of the percentage (A) and absolute number (B) of CD28-CD8+ T cells.

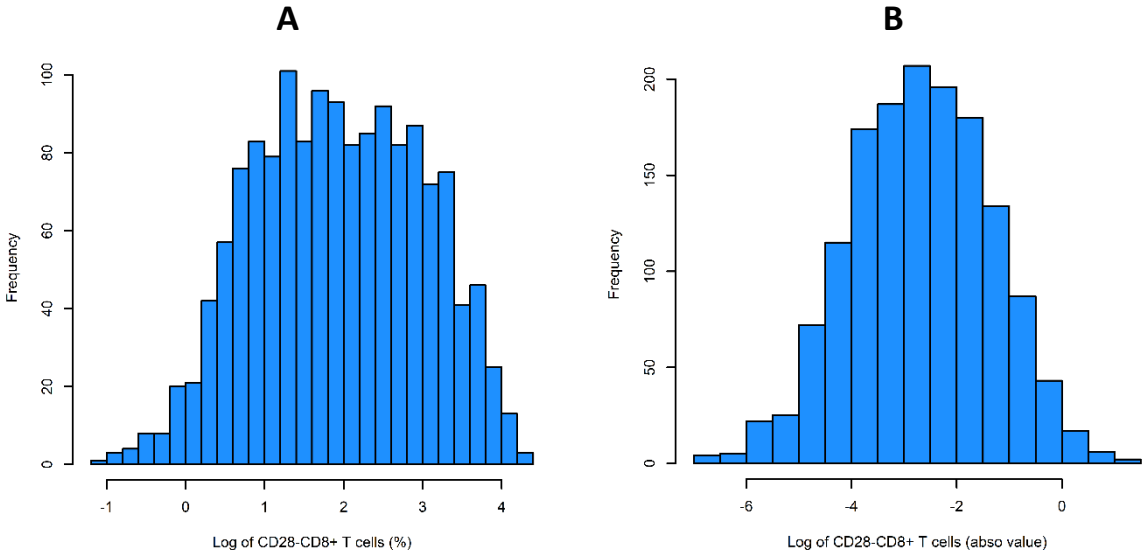

**Supplementary Figure 3:** Functional studies of CD8+ T cells in kidney recipients with normal/subnormal biopsies (group 1). Frozen PBMCs (n=46) from kidney recipients belonging to group 1 (normal/subnormal biopsies) were retrieved from our biocollection, thawed, kept in the resting state overnight in complete RPMI medium. The next day, PBMCs were stimulated for 4 h with plate-bound anti-CD3 mAb combined with soluble anti-CD28 mAb or IL-15 (A), and plate-bound anti-CD16 mAb combined with soluble IL-15 (B) as indicated. Cells were stained for surface CD8, CD28, and CD107a, followed by intracellular staining for TNF $\alpha$  and IFN $\gamma$  and analyzed by flow cytometry. The percentage of cells double positive for TNF $\alpha$  and IFN $\gamma$  (left) and positive for CD107a (right) among CD28+CD8+ (open circles) and CD28-CD8+ (filled circles) T cells are shown. \*\*\*\*: p<0.0001.

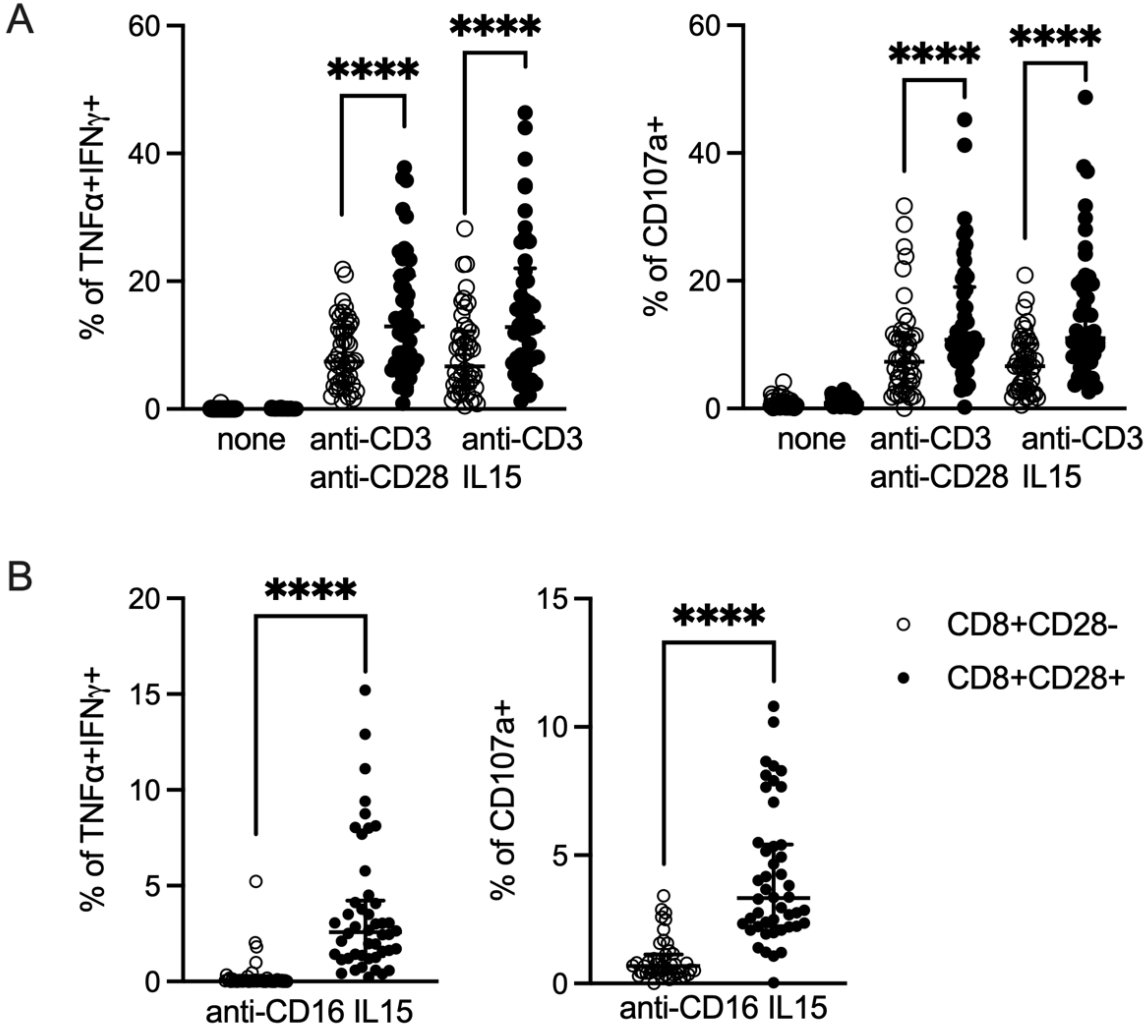

**Supplementary Figure 4:** Unadjusted graft survival curve (deaths censored) estimated by the Kaplan-Meier method in the 510 recipients with a 1-year protocol biopsy.

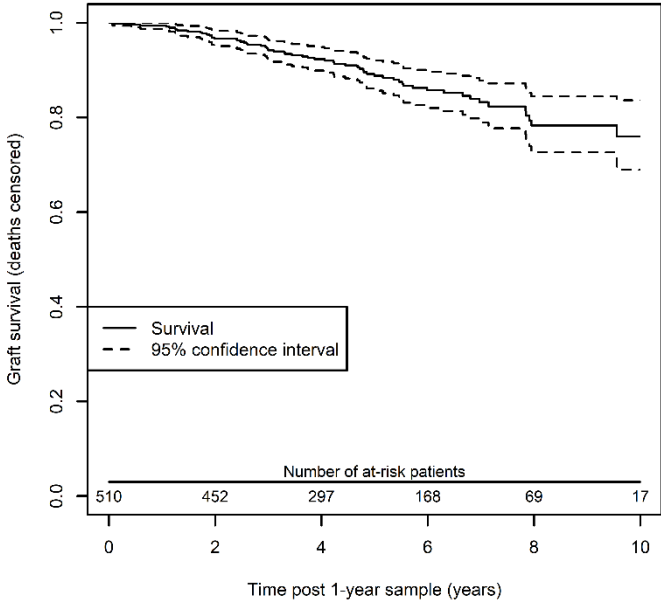

**Supplementary Figure 5:** Cumulative incidence curves of death-censored graft survival estimated from the Kaplan-Meier estimator and the Aalen-Johansen estimator taking into account deaths with functioning graft as competing events in the 510 recipients with a 1-year protocol biopsy.

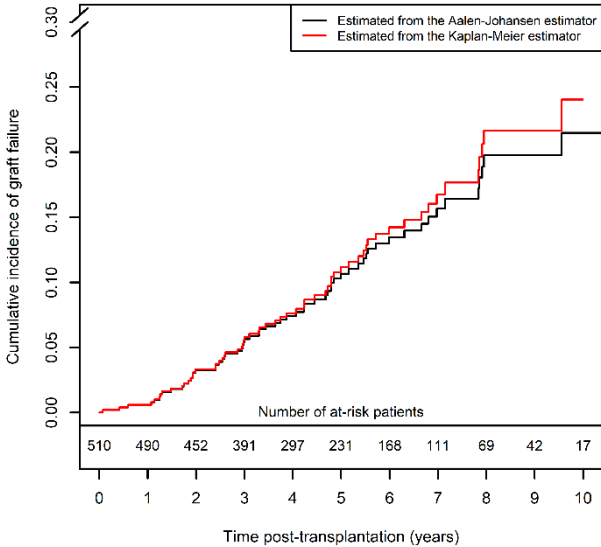

Supplement: mmc1.pdf [file mmc1.pdf]
